# Supplementary material for: Recurrent Pregnancy Loss Etiology, Risk Factors, Diagnosis, and Management. Fresh Look into a Full Box
Source: MDPI journal article supplement (doi:10.3390/jcm12124074), 2023-06-15
Supplement: s1 [file s1]

**Table S1.** Search strategy.

| <b>Keyword</b>                                 | <b>MeSH Unique ID</b> |
|------------------------------------------------|-----------------------|
| Spontaneous pregnancy loss                     | -                     |
| Early pregnancy loss                           | -                     |
| Spontaneous abortion                           | D000022               |
| Recurrent pregnancy loss                       | -                     |
| Recurrent miscarriage                          | -                     |
| Recurrent early pregnancy loss                 | -                     |
| Habitual abortion                              | D000026               |
| Missed abortion                                | D000030               |
| Incomplete abortion                            | D000027               |
| Embryo loss                                    | D020964               |
| Pregnancy complications                        | D011248               |
| Progesterone                                   | D011374               |
| Luteal phase deficiency                        | -                     |
| Luteal phase                                   | D008183               |
| Factor V Leiden                                | C095381               |
| MTHFR deficiency                               | C565512               |
| Methylenetetrahydrofolate reductase deficiency | C537357               |
| Homocysteine                                   | D006710               |
| Hyperhomocysteinemia                           | D020138               |
| Antiphospholipid syndrome                      | D016736               |
| Uterine diseases                               | D014591               |
| Vitamin D deficiency                           | D014808               |
| Psychological stress                           | D013315               |
| Anxiety                                        | -                     |
| Anxiousness                                    | D001007               |
| Depression                                     | -                     |
| Depressive symptom                             | D003863               |
